# Supplementary material for: Novel phosphorylated TAK1 species with functional impact on NF-κB and β-catenin signaling in human Cutaneous T-cell lymphoma
Source: PubMed Central journal article supplement — Leukemia. 2018 Feb 22;32(10):2211–23. doi: 10.1038/s41375-018-0066-4 (PMC6170395; doi:10.1038/s41375-018-0066-4), 2018-02-22

Figure S1: PP1 regulates canonical NF- $\kappa$ B signaling

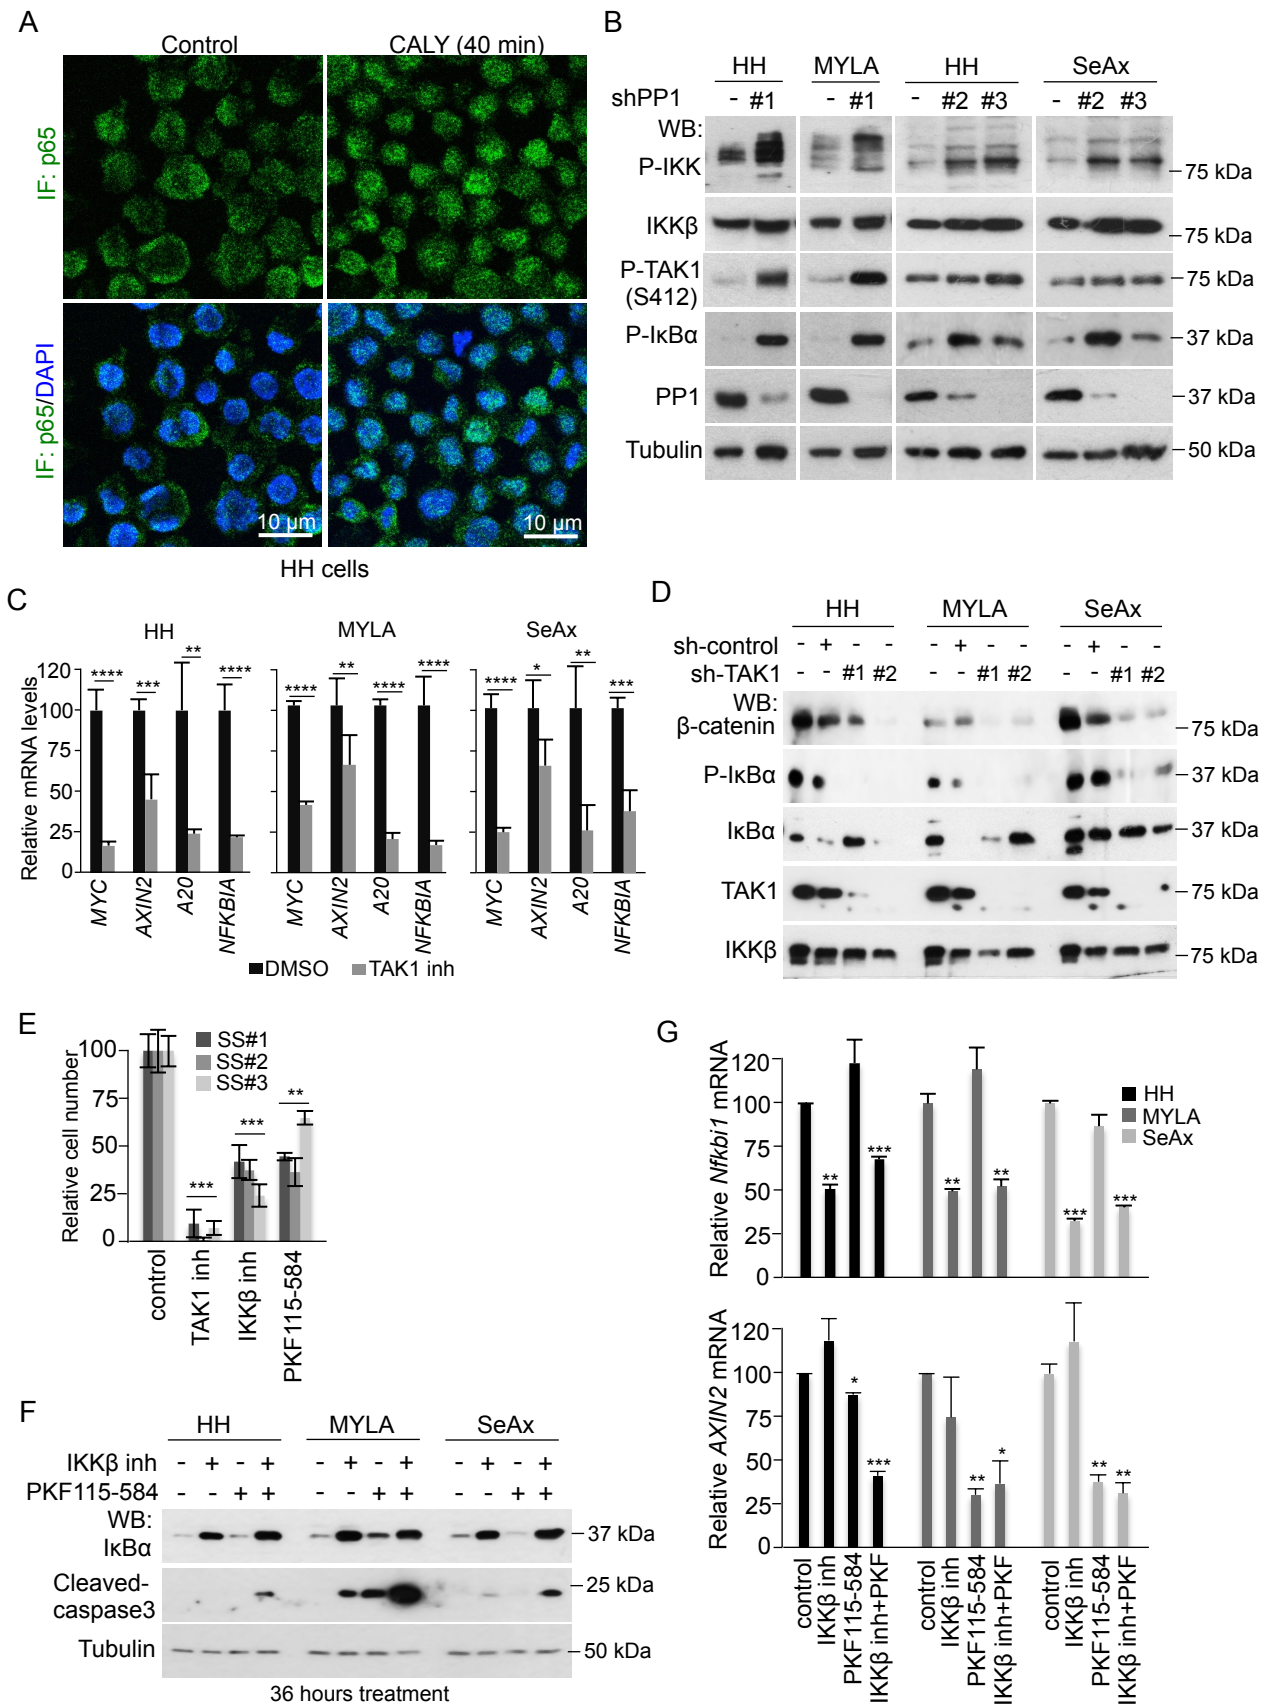

Figure S2: Knocking down ROCK1 results in I $\kappa$ B $\alpha$  stabilization

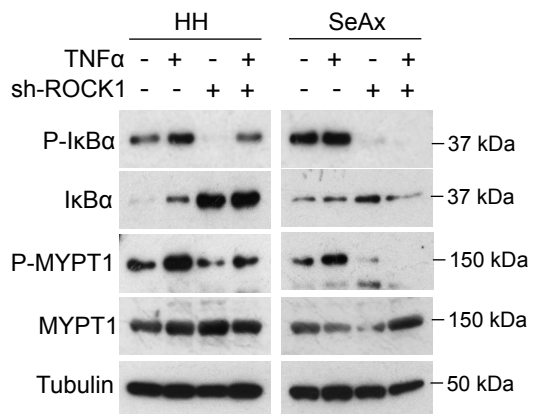

Figure S3: TAK1 becomes hyper-phosphorylated after PP1 inhibition

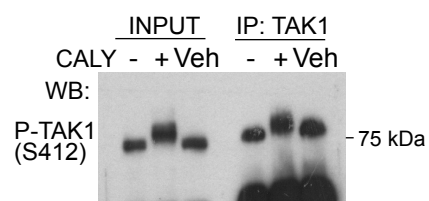

Figure S4: Antibodies against phosphorylated TAK1 peptides specifically recognize phosphorylated TAK1 from CTCL cells

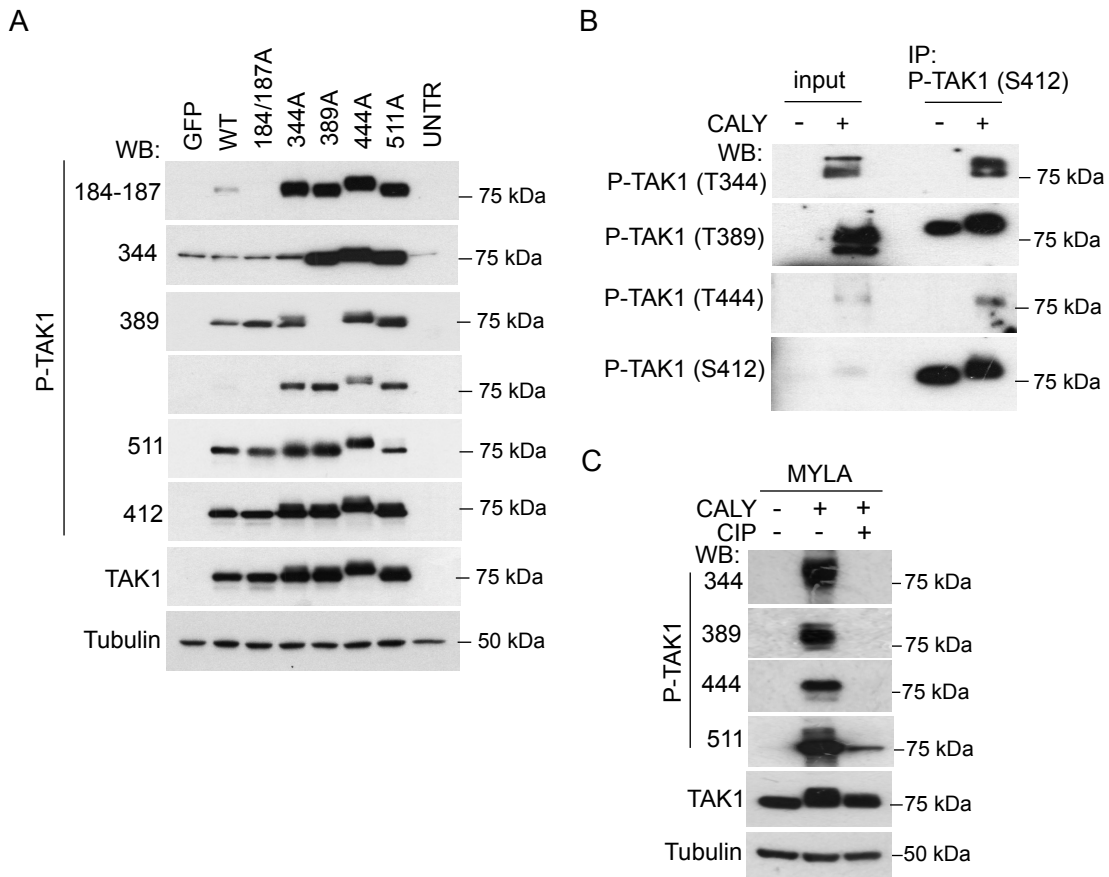

Figure S5: Characterization of CTCL tumors in vivo and effect of daily treatment with 10 mg/Kg TAK1 inhibitor.

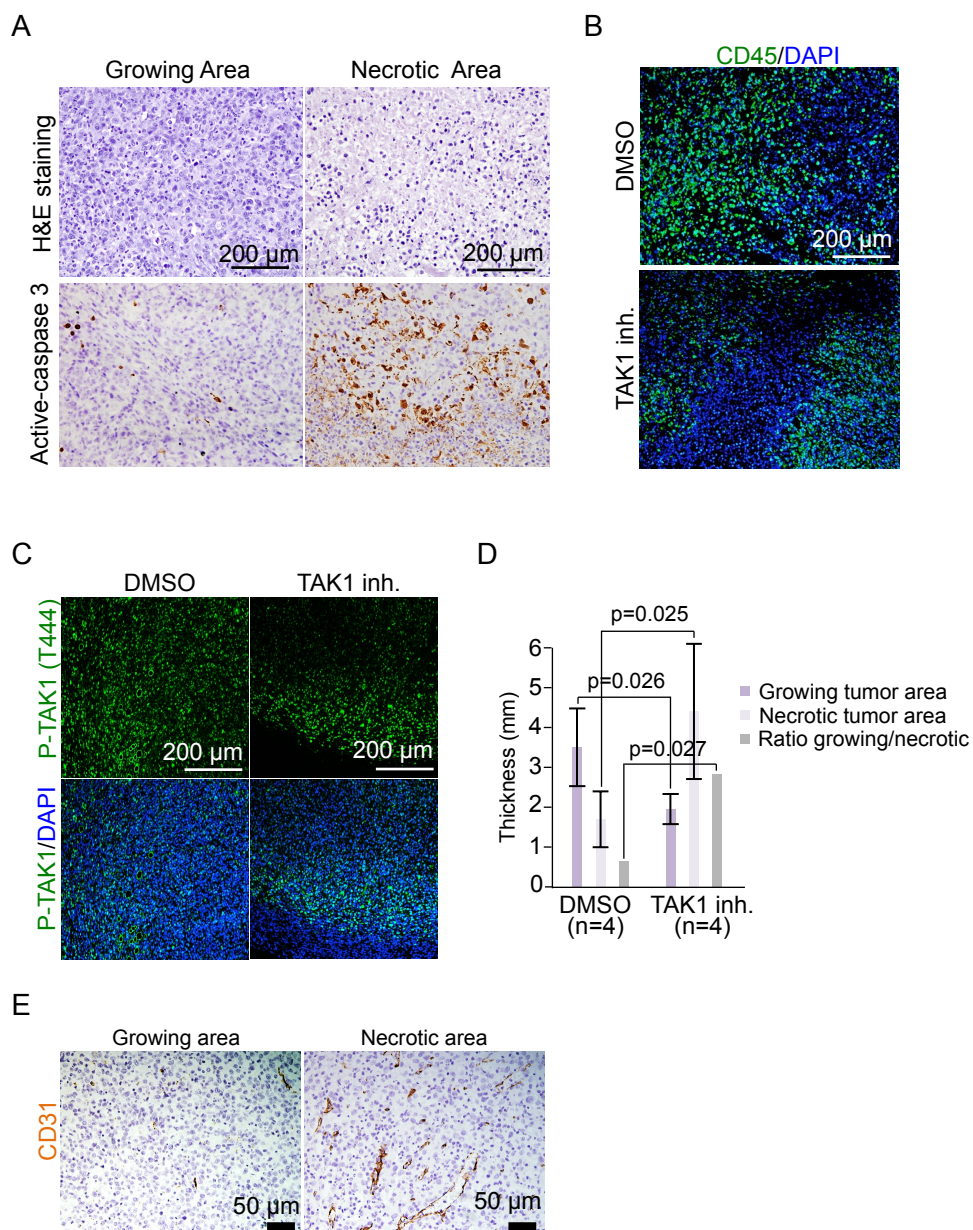

Figure S6: Detection of active NF- $\kappa$ B and  $\beta$ -catenin in frozen and paraffin-embedded CTCL human samples

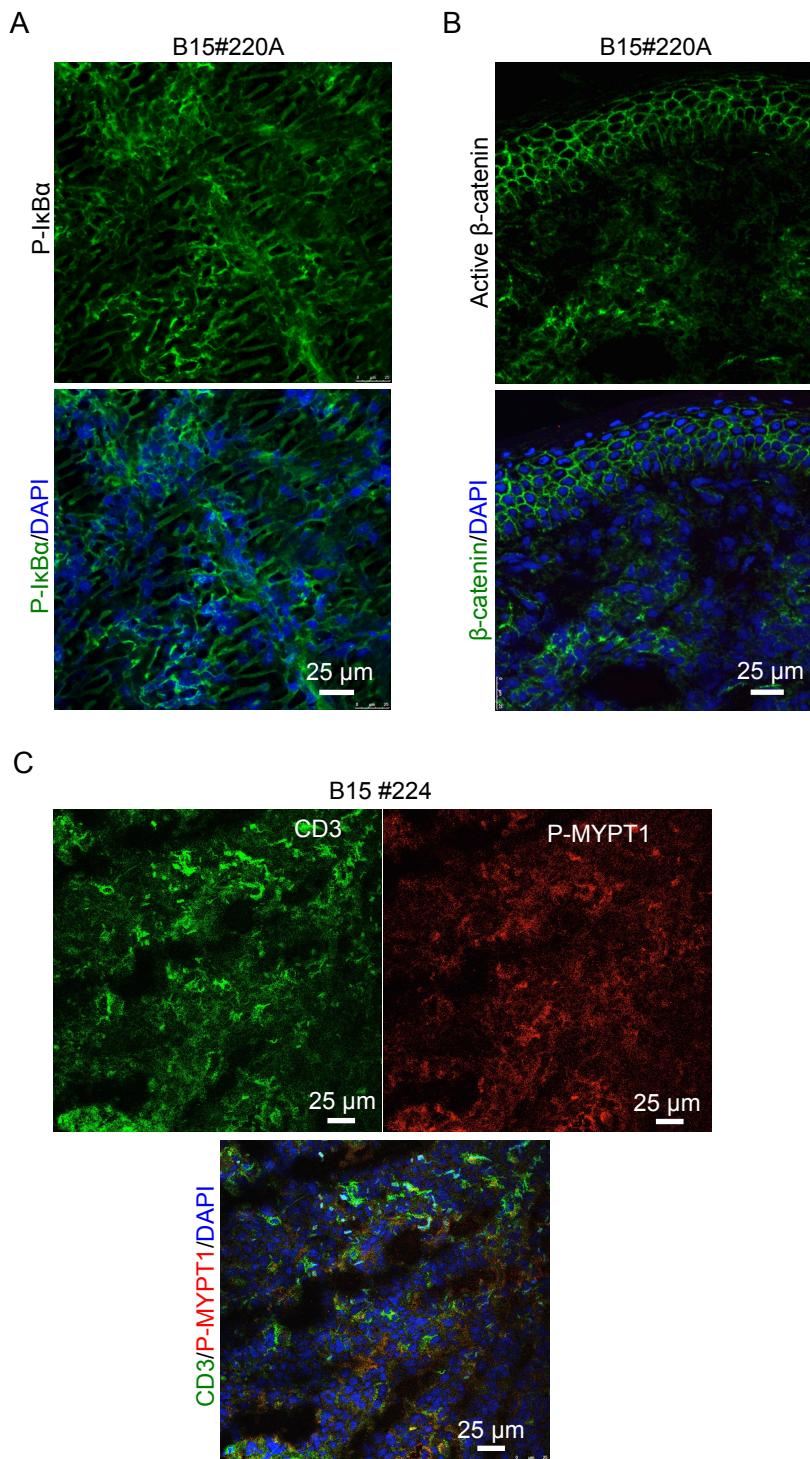

Supplement: 41375_2018_66_MOESM3_ESM.pdf [file 41375_2018_66_MOESM3_ESM.pdf]
